# Supplementary material for: N-Heterocyclic Germylenes: Structural Characterisation of Some Heavy Analogues of the Ubiquitous N-Heterocyclic Carbenes
Source: Hindawi journal article supplement (doi:10.1155/2019/9178371), 2019-01-23
Supplement: f1 [file 9178371.f1.docx]

1H NMR spectrum of compound **1** in C6D12

13C {1H} NMR spectrum of compound **1** in C6D12

1H NMR spectrum of compound **2** in C6D12


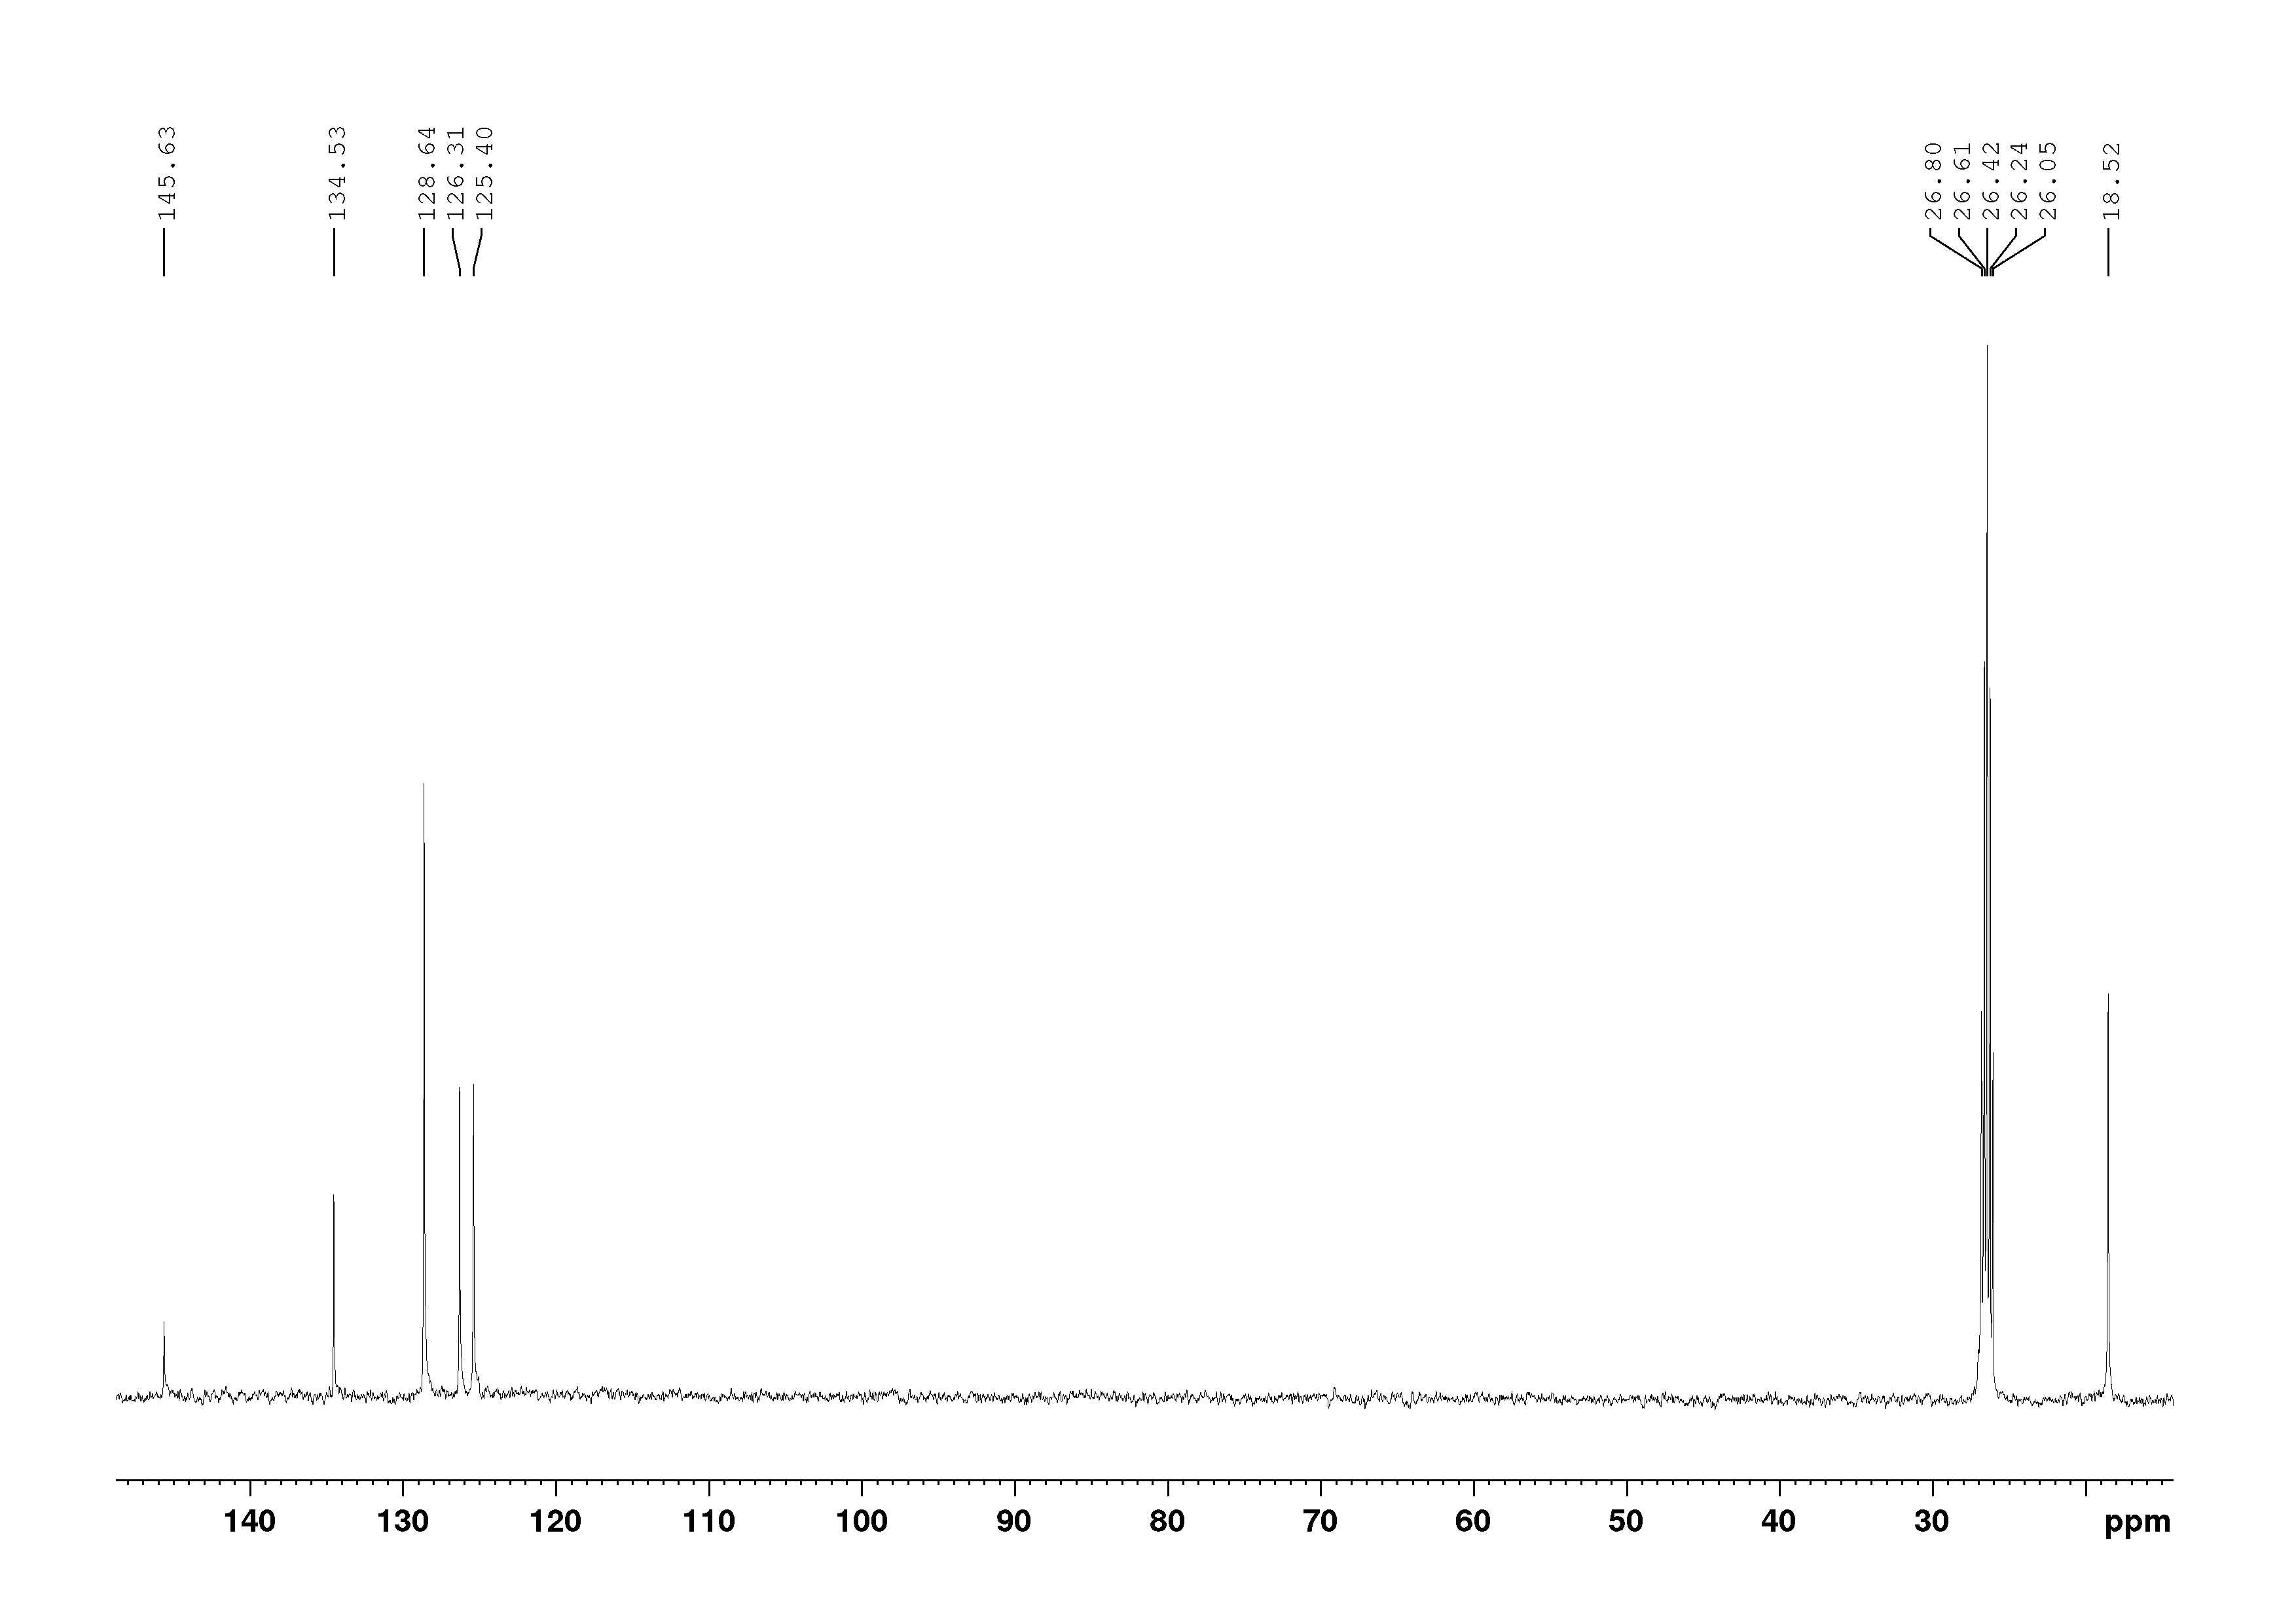


13C {1H} NMR spectrum of compound **2** in C6D12


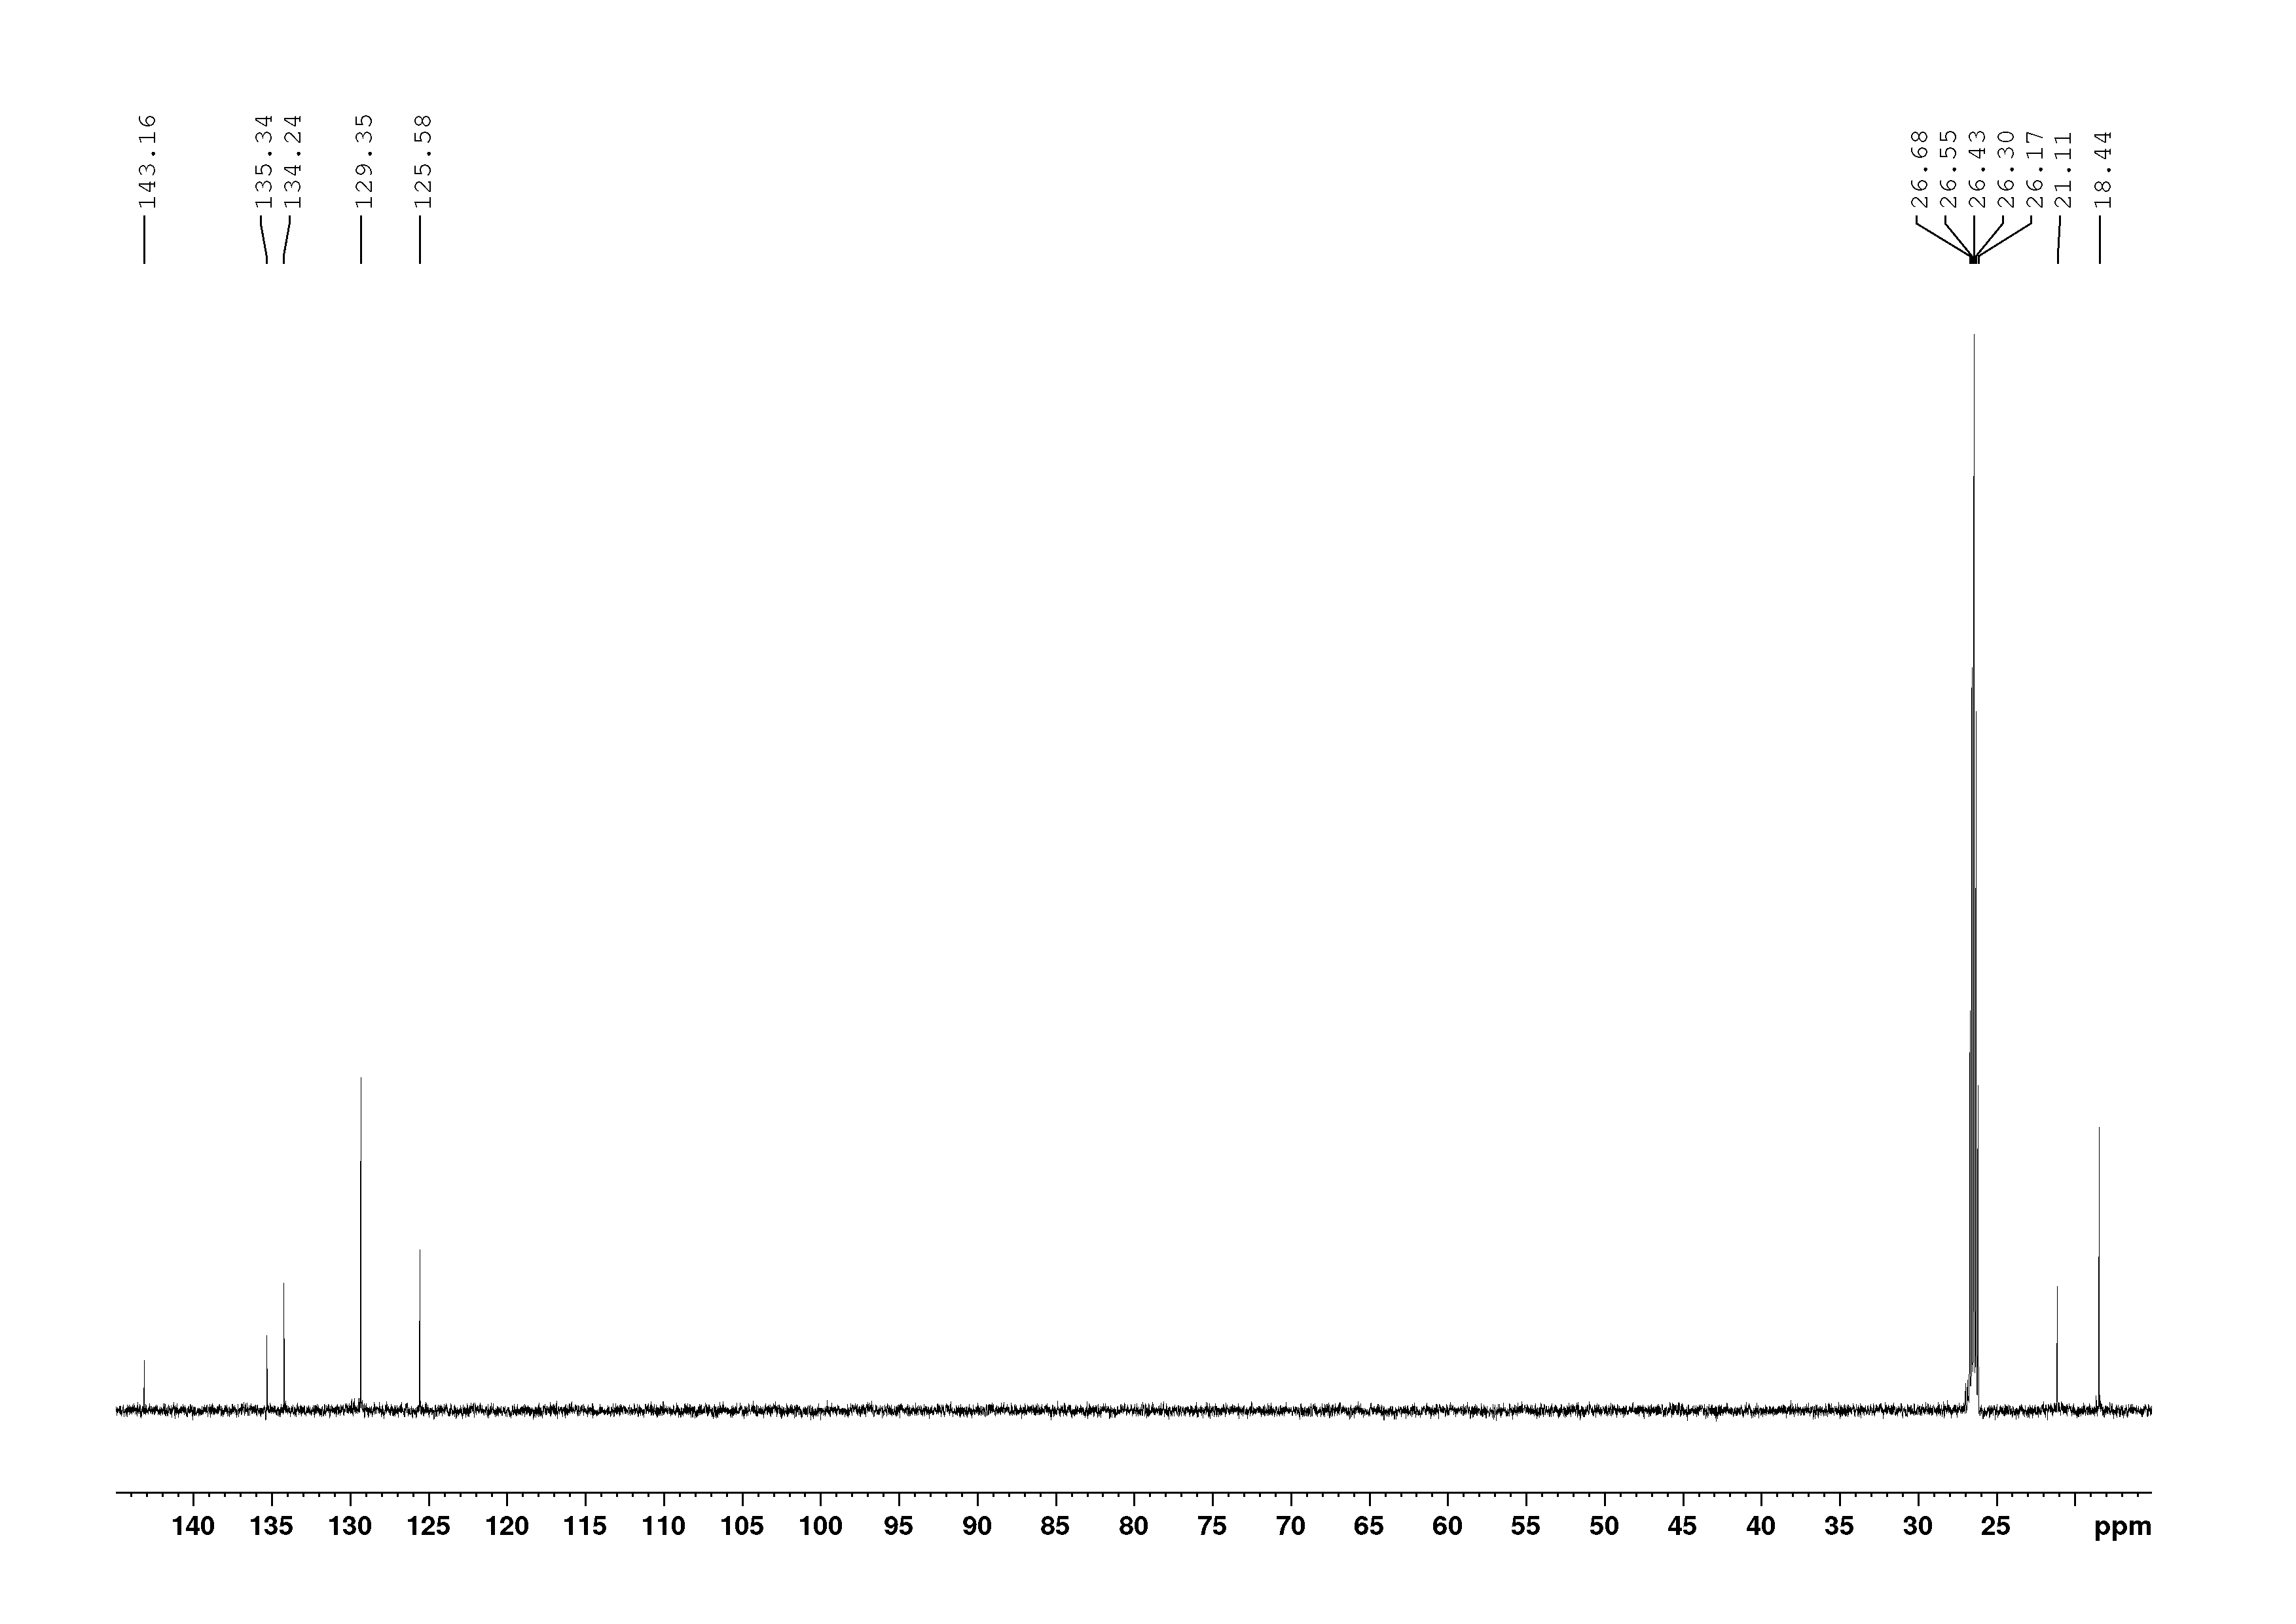


1H NMR spectrum of compound **3** in C6D12
